# Supplementary material for: Forward Genetic Screening Identifies a Small Molecule That Blocks Toxoplasma gondii Growth by Inhibiting Both Host- and Parasite-Encoded Kinases
Source: PLoS Pathog. 2014 Jun 12;10(6):e1004180. doi: 10.1371/journal.ppat.1004180 (PMC4055737; doi:10.1371/journal.ppat.1004180)
Supplement: Table S1 — Summary of the whole genome sequencing of the parental and SBR mutants. The first sheet is a summary of the sequencing for each strain and the number of base pairs sequenced for parasite nuclear and mitochondrial genomes as well as the host genome. The other sheets list the position of each identified mutation, how the mutation affected the a change in protein sequence, and, if applicable, the gene in which the mutation lies. (XLS) [file ppat.1004180.s003.xls]

## Sheet: Sequencing Summary Data
Parental RhD
Toxo Contigs =	46269045	0.9748
Unaligned contigs =	1095872	0.0231
Human reads =	91496	0.0019
Mitochondrial reads =	8401	0.0002
Total reads =	47464814
SBR1
Toxo Contigs =	34363248	0.986437
Unaligned contigs =	434401	0.01247
Human reads =	35949	0.00103196
Mitochondrial reads =	2115	6.07136e-05
Total reads =	34835713
SBR2
Toxo Contigs =	57050433	0.95597
Unaligned contigs =	2581570	0.0432583
Human reads =	39749	0.000666057
Mitochondrial reads =	6318	0.000105868
Total reads =	59678070
SBR3
Toxo Contigs =	47632177	0.973218
Unaligned contigs =	1182912	0.0241692
Human reads =	116256	0.00237534
Mitochondrial reads =	11639	0.000237807
Total reads =	48942984

## Sheet: SBR1
Chromosome	Position	Ref (+ Strand)	Substitution (+ Strand)	Codon Change	AA change	Gene	Gene annotation
gb_TGGT1_chrII	1785385	A	G	ATA to ACA	Ile to Thr	TGGT1_096790;	Name=TGGT1_096790;description=conserved+hypothetical+protein;size=1468;web_id=TGGT1_096790;locus_tag=TGGT1_096790;size=1468
gb_TGGT1_chrIII	98286	G	C	GGC to CGC	Gly to Arg	TGGT1_000370;	Name=TGGT1_000370;description=phosphatidylinositol+3-+and+4-kinase+domain-containing+protein%2C+putative;size=9754;web_id=TGGT1_000370;locus_tag=TGGT1_000370;size=9754
gb_TGGT1_chrIX	814157	T	C	AAA to AGA	Lys to Arg	TGGT1_058140;	Name=TGGT1_058140;description=conserved+hypothetical+protein;size=9758;web_id=TGGT1_058140;locus_tag=TGGT1_058140;size=9758
gb_TGGT1_chrIX	1106425	G	C	GCG to CCG	Ala to Pro	TGGT1_076000;	Name=TGGT1_076000;description=Atypical+MEK-related+kinase+%28incomplete+catalytic+triad%29;size=7406;web_id=TGGT1_076000;locus_tag=TGGT1_076000;size=7406
gb_TGGT1_chrVI	2112257	T	C	GTC to GCC	Val to Ala	TGGT1_047300;	Name=TGGT1_047300;description=conserved+hypothetical+protein;size=13461;web_id=TGGT1_047300;locus_tag=TGGT1_047300;size=13461
gb_TGGT1_chrVIII	799729	A	C	CTG to CGG	Leu to Arg	TGGT1_117500;	Name=TGGT1_117500;description=dpy-30+motif-containing+protein%2C+putative;size=6359;web_id=TGGT1_117500;locus_tag=TGGT1_117500;size=6359
gb_TGGT1_chrVIII	2000828	G	C	ACT to AGT	Thr to Ser	TGGT1_115340;	Name=TGGT1_115340;description=endonuclease%2Fexonuclease%2Fphosphatase+domain-containing+protein%2C+putative;size=2822;web_id=TGGT1_115340;locus_tag=TGGT1_115340;size=2822
gb_TGGT1_chrVIII	4787763	T	G	TCT to GCT	Ser to Ala	TGGT1_109900;	Name=TGGT1_109900;description=conserved+hypothetical+protein;size=5864;web_id=TGGT1_109900;locus_tag=TGGT1_109900;size=5864
gb_TGGT1_chrVIIa	192009	T	C	AGT to GGT	Ser to Gly	TGGT1_072670;	Name=TGGT1_072670;description=conserved+hypothetical+protein;size=18229;web_id=TGGT1_072670;locus_tag=TGGT1_072670;size=18229
gb_TGGT1_chrVIIb	1071635	G	A	GGG to AGG	Gly to Arg	TGGT1_007380;	Name=TGGT1_007380;description=ctr+copper+transporter%2C+putative;size=2857;web_id=TGGT1_007380;locus_tag=TGGT1_007380;size=2857
gb_TGGT1_chrX	2487801	T	A	CAG to CTG	Glu to Leu	TGGT1_080010;	Name=TGGT1_080010;description=conserved+hypothetical+protein;size=2786;web_id=TGGT1_080010;locus_tag=TGGT1_080010;size=2786
gb_TGGT1_chrXI	508367	T	C	ACT to GCT	Thr to Ala	TGGT1_085850;	Name=TGGT1_085850;description=conserved+hypothetical+protein;size=2692;web_id=TGGT1_085850;locus_tag=TGGT1_085850;size=2692
gb_TGGT1_chrXI	2403023	A	G	ATC to ACC	Ile to Thr	TGGT1_088860;	Name=TGGT1_088860;description=CMGC+kinase%2C+MAPK+family+%28ERK%29+TgMAPK-1;size=7329;web_id=TGGT1_088860;locus_tag=TGGT1_088860;size=7329
gb_TGGT1_chrXII	1871975	G	A	TTC to TTT	Phe to Phe	TGGT1_028660;	Name=TGGT1_028660;description=protease+inhibitor%2C+putative;size=2920;web_id=TGGT1_028660;locus_tag=TGGT1_028660;size=2920
gb_TGGT1_chrXII	3224049	G	A	TCC to TTC	Ser to Phe	TGGT1_025780;	Name=TGGT1_025780;description=hypothetical+protein;size=3877;web_id=TGGT1_025780;locus_tag=TGGT1_025780;size=3877
gb_TGGT1_chrIX	4649100	A	T	TGC to AGC	Cys to Ser	TGGT1_041770;	Name=TGGT1_041770;description=conserved+hypothetical+protein;size=2547;web_id=TGGT1_041770;locus_tag=TGGT1_041770;size=2547
gb_TGGT1_chrVIIa	2036861	G	T	GGC to GGA	Gly to Gly	TGGT1_016710;	Name=TGGT1_016710;description=conserved+hypothetical+protein;size=2572;web_id=TGGT1_016710;locus_tag=TGGT1_016710;size=2572
gb_TGGT1_chrIV	163408	T	C	none	none	TGGT1_120650;	Name=TGGT1_120650;description=cyclophilin%2C+putative;size=9434;web_id=TGGT1_120650;locus_tag=TGGT1_120650;size=9434
gb_TGGT1_chrIX	2186055	T	A	none	none	TGGT1_033960;	Name=TGGT1_033960;description=conserved+hypothetical+protein;size=1832;web_id=TGGT1_033960;locus_tag=TGGT1_033960;size=1832
gb_TGGT1_chrIX	3316449	G	C	none	none	TGGT1_031880;	Name=TGGT1_031880;description=conserved+hypothetical+protein;size=8020;web_id=TGGT1_031880;locus_tag=TGGT1_031880;size=8020
gb_TGGT1_chrIb	62867	T	C	none	none	TGGT1_020390;	Name=TGGT1_020390;description=intraflagellar+transport+particle+protein%2C+putative;size=3508;web_id=TGGT1_020390;locus_tag=TGGT1_020390;size=3508
gb_TGGT1_chrV	953960	T	C	none	none	TGGT1_039220;	Name=TGGT1_039220;description=conserved+hypothetical+protein;size=9082;web_id=TGGT1_039220;locus_tag=TGGT1_039220;size=9082
gb_TGGT1_chrV	1219796	C	G	none	none	TGGT1_038740;	Name=TGGT1_038740;description=hypothetical+protein;size=9997;web_id=TGGT1_038740;locus_tag=TGGT1_038740;size=9997
gb_TGGT1_chrV	1351390	T	C	none	none	TGGT1_038580;	Name=TGGT1_038580;description=regulator+of+chromosome+condensation%2C+putative;size=6890;web_id=TGGT1_038580;locus_tag=TGGT1_038580;size=6890
gb_TGGT1_chrV	1806411	G	C	none	none	TGGT1_037690;	Name=TGGT1_037690;description=TGGT1_037690;size=72;web_id=TGGT1_037690;locus_tag=TGGT1_037690;size=72
gb_TGGT1_chrV	2609388	G	A	none	none	TGGT1_036530;	Name=TGGT1_036530;description=plasma-membrane+proton-ATPase%2C+putative;size=15488;web_id=TGGT1_036530;locus_tag=TGGT1_036530;size=15488
gb_TGGT1_chrVIII	811671	G	C	none	none	TGGT1_117480;	Name=TGGT1_117480;description=conserved+hypothetical+protein;size=1348;web_id=TGGT1_117480;locus_tag=TGGT1_117480;size=1348
gb_TGGT1_chrVIII	1688690	C	T	none	none	TGGT1_115790;	Name=TGGT1_115790;description=pre-mRNA+splicing+factor+PRP8%2C+putative;size=15303;web_id=TGGT1_115790;locus_tag=TGGT1_115790;size=15303
gb_TGGT1_chrVIII	4170279	C	A	none	none	TGGT1_111380;	Name=TGGT1_111380;description=conserved+hypothetical+protein;size=12224;web_id=TGGT1_111380;locus_tag=TGGT1_111380;size=12224
gb_TGGT1_chrVIIa	335120	C	A	none	none	TGGT1_072820;	Name=TGGT1_072820;description=conserved+hypothetical+protein;size=15852;web_id=TGGT1_072820;locus_tag=TGGT1_072820;size=15852
gb_TGGT1_chrVIIb	703983	C	G	none	none	TGGT1_043320;	Name=TGGT1_043320;description=Rhoptry+kinase+family+protein+ROP21;size=4828;web_id=TGGT1_043320;locus_tag=TGGT1_043320;size=4828
gb_TGGT1_chrVIIb	3611115	C	T	none	none	TGGT1_012140;	Name=TGGT1_012140;description=conserved+hypothetical+protein;size=5557;web_id=TGGT1_012140;locus_tag=TGGT1_012140;size=5557
gb_TGGT1_chrX	3159296	T	G	none	none	TGGT1_078720;	Name=TGGT1_078720;description=serine%2Fthreonine+protein+phosphatase%2C+putative;size=3759;web_id=TGGT1_078720;locus_tag=TGGT1_078720;size=3759
gb_TGGT1_chrX	4283665	C	G	none	none	TGGT1_071480;	Name=TGGT1_071480;description=conserved+hypothetical+protein;size=20248;web_id=TGGT1_071480;locus_tag=TGGT1_071480;size=20248
gb_TGGT1_chrX	5493588	A	G	none	none	TGGT1_069040;	Name=TGGT1_069040;description=conserved+hypothetical+protein;size=2002;web_id=TGGT1_069040;locus_tag=TGGT1_069040;size=2002
gb_TGGT1_chrX	6417325	T	C	none	none	TGGT1_125210;	Name=TGGT1_125210;description=Bis%285%27-nucleosyl%29-tetraphosphatase+%28asymmetrical%29%2C+putative;size=2930;web_id=TGGT1_125210;locus_tag=TGGT1_125210;size=2930
gb_TGGT1_chrXI	1661056	T	C	none	none	TGGT1_087750;	Name=TGGT1_087750;description=WD-40+repeat-containing+protein%2C+putative;size=14314;web_id=TGGT1_087750;locus_tag=TGGT1_087750;size=14314
gb_TGGT1_chrXI	5933501	G	A	none	none	TGGT1_098410;	Name=TGGT1_098410;description=hypothetical+protein;size=509;web_id=TGGT1_098410;locus_tag=TGGT1_098410;size=509
gb_TGGT1_chrXI	6233729	T	G	none	none	TGGT1_098960;	Name=TGGT1_098960;description=conserved+hypothetical+protein;size=2449;web_id=TGGT1_098960;locus_tag=TGGT1_098960;size=2449
gb_TGGT1_chrXII	2932415	T	C	none	none	TGGT1_026480;	Name=TGGT1_026480;description=conserved+hypothetical+protein;size=2132;web_id=TGGT1_026480;locus_tag=TGGT1_026480;size=2132
gb_TGGT1_chrXII	3182705	T	G	none	none	TGGT1_025930;	Name=TGGT1_025930;description=conserved+hypothetical+protein;size=3708;web_id=TGGT1_025930;locus_tag=TGGT1_025930;size=3708
gb_TGGT1_chrXII	5485046	C	T	none	none	TGGT1_102890;	Name=TGGT1_102890;description=conserved+hypothetical+protein;size=4816;web_id=TGGT1_102890;locus_tag=TGGT1_102890;size=4816
gb_TGGT1_chrII	1320565	A	G	none	none	none	none
gb_TGGT1_chrIV	1164212	A	G	none	none	none	none
gb_TGGT1_chrIX	1952211	A	G	none	none	none	none
gb_TGGT1_chrIa	487338	C	G	none	none	none	none
gb_TGGT1_chrIa	1166501	T	C	none	none	none	none
gb_TGGT1_chrIb	208239	A	G	none	none	none	none
gb_TGGT1_chrIb	879679	C	T	none	none	none	none
gb_TGGT1_chrIb	1656859	A	G	none	none	none	none
gb_TGGT1_chrVI	1731910	T	C	none	none	none	none
gb_TGGT1_chrVIII	6372724	G	C	none	none	none	none
gb_TGGT1_chrVIIa	1929128	G	A	none	none	none	none
gb_TGGT1_chrVIIa	2607104	C	G	none	none	none	none
gb_TGGT1_chrVIIb	19920	A	G	none	none	none	none
gb_TGGT1_chrX	1159023	C	T	none	none	none	none
gb_TGGT1_chrX	4640775	T	A	none	none	none	none
gb_TGGT1_chrX	4669003	T	C	none	none	none	none
gb_TGGT1_chrX	6840420	G	A	none	none	none	none
gb_TGGT1_chrX	7387504	A	G	none	none	none	none
gb_TGGT1_chrXI	132332	A	G	none	none	none	none
gb_TGGT1_chrXI	1533946	T	C	none	none	none	none
gb_TGGT1_chrXI	2068061	A	G	none	none	none	none
gb_TGGT1_chrXI	2473086	A	C	none	none	none	none
gb_TGGT1_chrXI	3195738	T	G	none	none	none	none
gb_TGGT1_chrXI	3923712	T	C	none	none	none	none
gb_TGGT1_chrXII	700791	C	T	none	none	none	none
gb_TGGT1_chrXII	2303209	A	G	none	none	none	none
gb_scf_1107000999210	3536	A	G	none	none	none	none
gb_scf_1107001000004	12782	C	G	none	none	none	none

## Sheet: SBR2
Chromosome	Position	Ref (+ Strand)	Substitution (+ Strand)	Codon Change	AA change	Gene	Gene annotation
gb|TGGT1_chrIa	1580600	A	G	CTC to CCC	Leu to Pro	TGGT1_054310;	Name=TGGT1_054310;description=ubiquitin-transferase+domain-containing+protein%2C+putative;size=14323;web_id=TGGT1_054310;locus_tag=TGGT1_054310;size=14323
gb|TGGT1_chrIII	2342484	T	G	TAC to TCC	Tyr to Ser	TGGT1_006180;	Name=TGGT1_006180;description=hypothetical+protein;size=4210;web_id=TGGT1_006180;locus_tag=TGGT1_006180;size=4210
gb|TGGT1_chrVIIa	748502	A	G	GAG to GGG	Glu to Gly	TGGT1_062120;	Name=TGGT1_062120;description=conserved+hypothetical+protein;size=2103;web_id=TGGT1_062120;locus_tag=TGGT1_062120;size=2103
gb|TGGT1_chrX	3590024	T	C	ACT to GCT	Thr to Ala	TGGT1_078060;	Name=TGGT1_078060;description=LCCL+domain-containing+protein+%2F+F5%2F8+type+C+domain-containing+protein%2C+putative;size=6247;web_id=TGGT1_078060;locus_tag=TGGT1_078060;size=6247
gb|TGGT1_chrX	4689036	G	C	CAG to CAC	Gln to His	TGGT1_070910;	Name=TGGT1_070910;description=conserved+hypothetical+protein;size=3078;web_id=TGGT1_070910;locus_tag=TGGT1_070910;size=3078
gb|TGGT1_chrX	7347119	C	T	CAA to TAA	Gln to STOP	TGGT1_023360;	Name=TGGT1_023360;description=conserved+hypothetical+protein;size=10901;web_id=TGGT1_023360;locus_tag=TGGT1_023360;size=10901
gb|TGGT1_chrXI	2403050	A	T	CTG to CAG	Leu to Gln	TGGT1_088860;	Name=TGGT1_088860;description=mitogen-activated+protein+kinase%2C+putative;size=7329;web_id=TGGT1_088860;locus_tag=TGGT1_088860;size=7329
gb|TGGT1_chrVIIa	1808195	G	C	CTG to CTC	Leu to Leu	TGGT1_016320;	Name=TGGT1_016320;description=conserved+hypothetical+protein;size=1583;web_id=TGGT1_016320;locus_tag=TGGT1_016320;size=1583
gb|TGGT1_chrII	1057005	A	G	none	none	TGGT1_066240;	Name=TGGT1_066240;description=ubiquitin+ligase+E3a%2C+putative;size=13747;web_id=TGGT1_066240;locus_tag=TGGT1_066240;size=13747
gb|TGGT1_chrIII	2285350	T	C	none	none	TGGT1_006200;	Name=TGGT1_006200;description=LSM+domain-containing+protein%2C+putative;size=2597;web_id=TGGT1_006200;locus_tag=TGGT1_006200;size=2597
gb|TGGT1_chrVIII	1963226	A	G	none	none	TGGT1_115410;	Name=TGGT1_115410;description=60S+ribosomal+protein+L30%2C+putative;size=2365;web_id=TGGT1_115410;locus_tag=TGGT1_115410;size=2365
gb|TGGT1_chrX	2926361	T	C	none	none	TGGT1_079270;	Name=TGGT1_079270;description=conserved+hypothetical+protein;size=4730;web_id=TGGT1_079270;locus_tag=TGGT1_079270;size=4730
gb|TGGT1_chrX	4974935	G	C	none	none	TGGT1_070090;	Name=TGGT1_070090;description=M16+peptidase+domain-containing+protein%2C+putative;size=18056;web_id=TGGT1_070090;locus_tag=TGGT1_070090;size=18056
gb|TGGT1_chrXI	1723620	C	A	none	none	TGGT1_087840;	Name=TGGT1_087840;description=conserved+hypothetical+protein;size=5872;web_id=TGGT1_087840;locus_tag=TGGT1_087840;size=5872
gb|TGGT1_chrXII	6521273	A	C	none	none	TGGT1_104780;	Name=TGGT1_104780;description=conserved+hypothetical+protein;size=5309;web_id=TGGT1_104780;locus_tag=TGGT1_104780;size=5309
gb|TGGT1_chrII	1514251	T	G	none	none	none	none
gb|TGGT1_chrIV	627838	T	C	none	none	none	none
gb|TGGT1_chrIX	866261	C	T	none	none	none	none
gb|TGGT1_chrIX	3423793	T	G	none	none	none	none
gb|TGGT1_chrIX	5368252	G	A	none	none	none	none
gb|TGGT1_chrX	3440335	T	G	none	none	none	none
gb|TGGT1_chrX	5128380	A	G	none	none	none	none
gb|TGGT1_chrXII	1863993	A	G	none	none	none	none
gb|TGGT1_chrXII	4125065	A	T	none	none	none	none
gb|TGGT1_chrXII	5652771	A	C	none	none	none	none

## Sheet: SBR3
Chromosome	Position	Ref (+ Strand)	Substitution (+ Strand)	Codon Change	AA change	Gene	Gene annotation
gb|TGGT1_chrIa	115048	C	G	GGG to GCG	Gly to Ala	TGGT1_073380;	Name=TGGT1_073380;description=hypothetical+protein;size=1678;web_id=TGGT1_073380;locus_tag=TGGT1_073380;size=1678
gb|TGGT1_chrIb	1346742	T	C	CTT to CCT	Leu to Pro	TGGT1_022510;	Name=TGGT1_022510;description=conserved+hypothetical+protein;size=6811;web_id=TGGT1_022510;locus_tag=TGGT1_022510;size=6811
gb|TGGT1_chrII	334783	C	T	GAC to AAC	Asp to Asn	TGGT1_065400;	Name=TGGT1_065400;description=conserved+hypothetical+protein;size=7356;web_id=TGGT1_065400;locus_tag=TGGT1_065400;size=7356
gb|TGGT1_chrII	2100049	G	T	TAC to TAA	Tyr to STOP	TGGT1_096230;	Name=TGGT1_096230;description=dense-granule+antigen+DG32%2C+putative;size=2253;web_id=TGGT1_096230;locus_tag=TGGT1_096230;size=2253
gb|TGGT1_chrIV	815521	G	A	GCA to ACA	Ala to Thr	TGGT1_121670;	Name=TGGT1_121670;description=conserved+hypothetical+protein;size=8559;web_id=TGGT1_121670;locus_tag=TGGT1_121670;size=8559
gb|TGGT1_chrVIIa	1525434	T	A	CTG to CAG	Leu to Gln	TGGT1_063840;	Name=TGGT1_063840;description=conserved+hypothetical+protein;size=5659;web_id=TGGT1_063840;locus_tag=TGGT1_063840;size=5659
gb|TGGT1_chrVIIa	2934749	A	G	ACG to GCG	Thr to Ala	TGGT1_018030;	Name=TGGT1_018030;description=hypothetical+protein;size=3251;web_id=TGGT1_018030;locus_tag=TGGT1_018030;size=3251
gb|TGGT1_chrVIIa	4335941	C	T	CGT to TGT	Arg to Cys	TGGT1_005430;	Name=TGGT1_005430;description=conserved+hypothetical+protein;size=10289;web_id=TGGT1_005430;locus_tag=TGGT1_005430;size=10289
gb|TGGT1_chrXI	2403023	A	T	ATC to AAC	Ile to Asn	TGGT1_088860;	Name=TGGT1_088860;description=mitogen-activated+protein+kinase%2C+putative;size=7329;web_id=TGGT1_088860;locus_tag=TGGT1_088860;size=7329
gb|TGGT1_chrXII	180324	C	T	ACG to ATG	Thr to Met	TGGT1_095040;	Name=TGGT1_095040;description=conserved+hypothetical+protein;size=4116;web_id=TGGT1_095040;locus_tag=TGGT1_095040;size=4116
gb|TGGT1_chrXII	5981749	A	G	GTT to GCT	Val to Ala	TGGT1_103850;	Name=TGGT1_103850;description=conserved+hypothetical+protein;size=2175;web_id=TGGT1_103850;locus_tag=TGGT1_103850;size=2175
gb|TGGT1_chrIV	1693561	T	C	GTT to GTC	Val to Val	TGGT1_123330;	Name=TGGT1_123330;description=conserved+hypothetical+protein;size=2946;web_id=TGGT1_123330;locus_tag=TGGT1_123330;size=2946
gb|TGGT1_chrV	1490994	A	C	CTT to CTG	Leu to Leu	TGGT1_038260;	Name=TGGT1_038260;description=kinesin+central+motor%2C+putative;size=9353;web_id=TGGT1_038260;locus_tag=TGGT1_038260;size=9353
gb|TGGT1_chrVI	3167741	G	A	CTC to CTT	Leu to Leu	TGGT1_045650;	Name=TGGT1_045650;description=conserved+hypothetical+protein;size=11014;web_id=TGGT1_045650;locus_tag=TGGT1_045650;size=11014
gb|TGGT1_chrXI	3364847	A	G	TCT to TCC	Ser to Ser	TGGT1_090380;	Name=TGGT1_090380;description=hypothetical+protein;size=10551;web_id=TGGT1_090380;locus_tag=TGGT1_090380;size=10551
gb|TGGT1_chrIa	706259	G	T	none	none	TGGT1_074500;	Name=TGGT1_074500;description=glucose-6-phosphate+dehydrogenase%2C+putative;size=6856;web_id=TGGT1_074500;locus_tag=TGGT1_074500;size=6856
gb|TGGT1_chrIb	1831931	T	C	none	none	TGGT1_064490;	Name=TGGT1_064490;description=transcription+regulatory+protein+SNF2%2C+putative;size=9681;web_id=TGGT1_064490;locus_tag=TGGT1_064490;size=9681
gb|TGGT1_chrII	245954	C	A	none	none	TGGT1_065270;	Name=TGGT1_065270;description=kinesin%2C+putative;size=8802;web_id=TGGT1_065270;locus_tag=TGGT1_065270;size=8802
gb|TGGT1_chrII	1057005	A	G	none	none	TGGT1_066240;	Name=TGGT1_066240;description=ubiquitin+ligase+E3a%2C+putative;size=13747;web_id=TGGT1_066240;locus_tag=TGGT1_066240;size=13747
gb|TGGT1_chrIII	1246279	G	T	none	none	TGGT1_003040;	Name=TGGT1_003040;description=conserved+hypothetical+protein;size=15672;web_id=TGGT1_003040;locus_tag=TGGT1_003040;size=15672
gb|TGGT1_chrIII	1479930	C	A	none	none	TGGT1_003440;	Name=TGGT1_003440;description=conserved+hypothetical+protein;size=7613;web_id=TGGT1_003440;locus_tag=TGGT1_003440;size=7613
gb|TGGT1_chrIII	1874980	A	G	none	none	TGGT1_004240;	Name=TGGT1_004240;description=hypothetical+protein;size=3403;web_id=TGGT1_004240;locus_tag=TGGT1_004240;size=3403
gb|TGGT1_chrV	518536	A	C	none	none	TGGT1_040010;	Name=TGGT1_040010;description=conserved+hypothetical+protein;size=6012;web_id=TGGT1_040010;locus_tag=TGGT1_040010;size=6012
gb|TGGT1_chrV	1049428	A	T	none	none	TGGT1_039100;	Name=TGGT1_039100;description=amidohydrolase%2C+putative;size=7418;web_id=TGGT1_039100;locus_tag=TGGT1_039100;size=7418
gb|TGGT1_chrV	1056580	T	A	none	none	TGGT1_039090;	Name=TGGT1_039090;description=conserved+hypothetical+protein;size=9097;web_id=TGGT1_039090;locus_tag=TGGT1_039090;size=9097
gb|TGGT1_chrV	2058710	A	T	none	none	TGGT1_037330;	Name=TGGT1_037330;description=conserved+hypothetical+protein;size=11180;web_id=TGGT1_037330;locus_tag=TGGT1_037330;size=11180
gb|TGGT1_chrVI	1087954	T	C	none	none	TGGT1_050620;	Name=TGGT1_050620;description=conserved+hypothetical+protein;size=9833;web_id=TGGT1_050620;locus_tag=TGGT1_050620;size=9833
gb|TGGT1_chrVIIb	380730	G	A	none	none	TGGT1_043970;	Name=TGGT1_043970;description=dihydrolipoamide+succinyltransferase+component+of+2-oxoglutarate+dehydrogenase%2C+putative;size=10551;web_id=TGGT1_043970;locus_tag=TGGT1_043970;size=10551
gb|TGGT1_chrVIIb	2053108	C	T	none	none	TGGT1_009370;	Name=TGGT1_009370;description=conserved+hypothetical+protein;size=5593;web_id=TGGT1_009370;locus_tag=TGGT1_009370;size=5593
gb|TGGT1_chrVIIb	3108139	T	A	none	none	TGGT1_010990;	Name=TGGT1_010990;description=33+kDa+dynein+arm+light+chain%2C+axonemal%2C+putative;size=4046;web_id=TGGT1_010990;locus_tag=TGGT1_010990;size=4046
gb|TGGT1_chrVIIb	4353317	T	C	none	none	TGGT1_013840;	Name=TGGT1_013840;description=conserved+hypothetical+protein;size=8750;web_id=TGGT1_013840;locus_tag=TGGT1_013840;size=8750
gb|TGGT1_chrVIIa	2748846	T	C	none	none	TGGT1_017730;	Name=TGGT1_017730;description=dynein+1-beta+heavy+chain%2C+flagellar+inner+arm+I1+complex%2C+putative;size=52896;web_id=TGGT1_017730;locus_tag=TGGT1_017730;size=52896
gb|TGGT1_chrVIII	1053821	T	C	none	none	TGGT1_117000;	Name=TGGT1_117000;description=conserved+hypothetical+protein;size=3703;web_id=TGGT1_117000;locus_tag=TGGT1_117000;size=3703
gb|TGGT1_chrVIII	1053831	G	C	none	none	TGGT1_117000;	Name=TGGT1_117000;description=conserved+hypothetical+protein;size=3703;web_id=TGGT1_117000;locus_tag=TGGT1_117000;size=3703
gb|TGGT1_chrVIII	2914700	A	G	none	none	TGGT1_113400;	Name=TGGT1_113400;description=leucine+rich+repeat+protein%2C+putative;size=3734;web_id=TGGT1_113400;locus_tag=TGGT1_113400;size=3734
gb|TGGT1_chrVIII	3497309	T	G	none	none	TGGT1_112540;	Name=TGGT1_112540;description=eukaryotic+translation+initiation+factor+3+subunit+6+interacting+protein%2C+putative;size=6598;web_id=TGGT1_112540;locus_tag=TGGT1_112540;size=6598
gb|TGGT1_chrIX	2417039	T	G	none	none	TGGT1_033590;	Name=TGGT1_033590;description=cathepsin+C%2C+putative;size=6404;web_id=TGGT1_033590;locus_tag=TGGT1_033590;size=6404
gb|TGGT1_chrIX	4576984	T	C	none	none	TGGT1_041850;	Name=TGGT1_041850;description=conserved+hypothetical+protein;size=7311;web_id=TGGT1_041850;locus_tag=TGGT1_041850;size=7311
gb|TGGT1_chrIX	5156075	T	C	none	none	TGGT1_040880;	Name=TGGT1_040880;description=bromodomain+cotaining+protein%2C+putative;size=7128;web_id=TGGT1_040880;locus_tag=TGGT1_040880;size=7128
gb|TGGT1_chrX	2533379	A	G	none	none	TGGT1_079950;	Name=TGGT1_079950;description=conserved+hypothetical+protein;size=7164;web_id=TGGT1_079950;locus_tag=TGGT1_079950;size=7164
gb|TGGT1_chrX	4871973	C	A	none	none	TGGT1_070220;	Name=TGGT1_070220;description=conserved+hypothetical+protein;size=5562;web_id=TGGT1_070220;locus_tag=TGGT1_070220;size=5562
gb|TGGT1_chrX	6783179	G	A	none	none	TGGT1_126000;	Name=TGGT1_126000;description=carbamoyl+phosphate+synthetase+II%2C+putative;size=24242;web_id=TGGT1_126000;locus_tag=TGGT1_126000;size=24242
gb|TGGT1_chrXI	5828395	A	G	none	none	TGGT1_098260;	Name=TGGT1_098260;description=excision+repair+protein+Rad15%2C+putative;size=14310;web_id=TGGT1_098260;locus_tag=TGGT1_098260;size=14310
gb|TGGT1_chrXII	1293947	T	C	none	none	TGGT1_029810;	Name=TGGT1_029810;description=conserved+hypothetical+protein;size=14000;web_id=TGGT1_029810;locus_tag=TGGT1_029810;size=14000
gb|TGGT1_chrXII	3759032	T	G	none	none	TGGT1_024780;	Name=TGGT1_024780;description=ATP-dependent+DNA+helicase+II%2C+70+kDa+subunit%2C+putative;size=10187;web_id=TGGT1_024780;locus_tag=TGGT1_024780;size=10187
gb|TGGT1_chrIII	1632829	T	C	none	none	none	none
gb|TGGT1_chrIII	1634496	T	A	none	none	none	none
gb|TGGT1_chrIV	443079	A	T	none	none	none	none
gb|TGGT1_chrV	216603	A	T	none	none	none	none
gb|TGGT1_chrVI	3127781	T	C	none	none	none	none
gb|TGGT1_chrVIIb	687491	C	G	none	none	none	none
gb|TGGT1_chrVIIa	228618	A	C	none	none	none	none
gb|TGGT1_chrVIIa	4424580	A	C	none	none	none	none
gb|TGGT1_chrVIII	2733249	A	G	none	none	none	none
gb|TGGT1_chrVIII	4115226	T	A	none	none	none	none
gb|TGGT1_chrVIII	4918775	A	T	none	none	none	none
gb|TGGT1_chrIX	1752366	T	A	none	none	none	none
gb|TGGT1_chrIX	3952167	T	G	none	none	none	none
gb|TGGT1_chrIX	4741177	C	T	none	none	none	none
gb|TGGT1_chrIX	5334857	A	C	none	none	none	none
gb|TGGT1_chrX	2669991	A	T	none	none	none	none
gb|TGGT1_chrX	3622339	C	G	none	none	none	none
gb|TGGT1_chrX	4929204	T	C	none	none	none	none
gb|TGGT1_chrX	5234884	T	G	none	none	none	none
gb|TGGT1_chrXI	1728149	A	G	none	none	none	none
gb|TGGT1_chrXI	5188421	T	C	none	none	none	none
gb|TGGT1_chrXII	3028762	T	A	none	none	none	none
gb|TGGT1_chrXII	3133224	T	A	none	none	none	none
gb|TGGT1_chrXII	3506503	T	G	none	none	none	none
gb|TGGT1_chrXII	4209208	T	C	none	none	none	none
gb|TGGT1_chrXII	4510847	T	C	none	none	none	none
